# Supplementary material for: Thermal distribution, physiological effects and toxicities of extracorporeally induced whole‐body hyperthermia in a pig model
Source: PubMed Central journal article supplement (PMC7058172; doi:10.14814/phy2.14366), 2020-02-25
Supplement: PHY2-8-e14366-s001.pdf [file PHY2-8-e14366-s001.pdf]

## Appendix/supplementary materials

Supplementary table 1. Missing data which are not included in the analysis and tables/figures.

| <b>Pig number</b> | <b>Timepoint number</b> | <b>Assessment</b>                         |
|-------------------|-------------------------|-------------------------------------------|
|                   |                         | <b>Thermal data</b>                       |
| 1-7               | All                     | Airway                                    |
| 3                 | All                     | Left auditory canal                       |
|                   |                         | <b>Vital signs</b>                        |
| 1                 | 2,14                    | HR, MAP                                   |
| 2                 | 11,15                   | HR, MAP                                   |
| 3                 | 2                       | HR, MAP                                   |
| 8                 | 6,33                    | MAP                                       |
| 8                 | 33,34                   | HR                                        |
| 9                 | 10                      | HR                                        |
| 11                | 2                       | HR,MAP                                    |
|                   |                         | <b>Biochemical</b>                        |
| 1                 | All                     | lactate                                   |
| 1                 | 11                      | All                                       |
| 2                 | 0                       | Lactate                                   |
| 2                 | 7                       | AF, ASAT, ALAT, LD, CK, haptoglobin       |
| 5                 | 0                       | Ionized calcium, bicarbonate, pH, lactate |
| 5                 | 11                      | Creatinine                                |
| 7                 | 18                      | Bicarbonate, pH, lactate, ionized calcium |
| 7                 | 20                      | Bicarbonate, pH, lactate, ionized calcium |
| 7-10              | 26                      | Bicarbonate, pH, lactate, ionized calcium |
| 8,10-12           | all                     | Leukocytes/thrombocytes                   |
| 8                 | 16                      | Hb                                        |
| 9                 | all                     | Thrombocytes                              |
| 9                 | 0,14,16,18,20,26,38     | Leukocytes                                |
| 10                | 20                      | Bicarbonate, pH, lactate, ionized calcium |
| 11                | 0                       | LD                                        |
